# Supplementary material
Source: MDPI journal article supplement (https://www.mdpi.com/2072-4292/15/14/3615)
Supplement: s1 [file s1]

# Supplementary Material

## NDVI response to satellite-estimated antecedent precipitation in dryland pastures

Carlos Brieva <sup>1,3</sup>, Patricia Saco <sup>1</sup>, Steven G. Sandi <sup>1,2</sup>, Sebastián Mora <sup>3</sup> and José Rodríguez <sup>1,\*</sup>

<sup>1</sup> School of Engineering and Centre for Water Security and Environmental Sustainability (CWSES), The University of Newcastle, Callaghan, NSW 2308, Australia

<sup>2</sup> School of Engineering, Deakin University, Geelong, VIC 3216, Australia

<sup>3</sup> Instituto Nacional de Tecnología Agropecuaria (INTA), EEA Rama Caída, Mendoza 5600, Argentina

\* Correspondence: jose.rodriguez@newcastle.edu.au

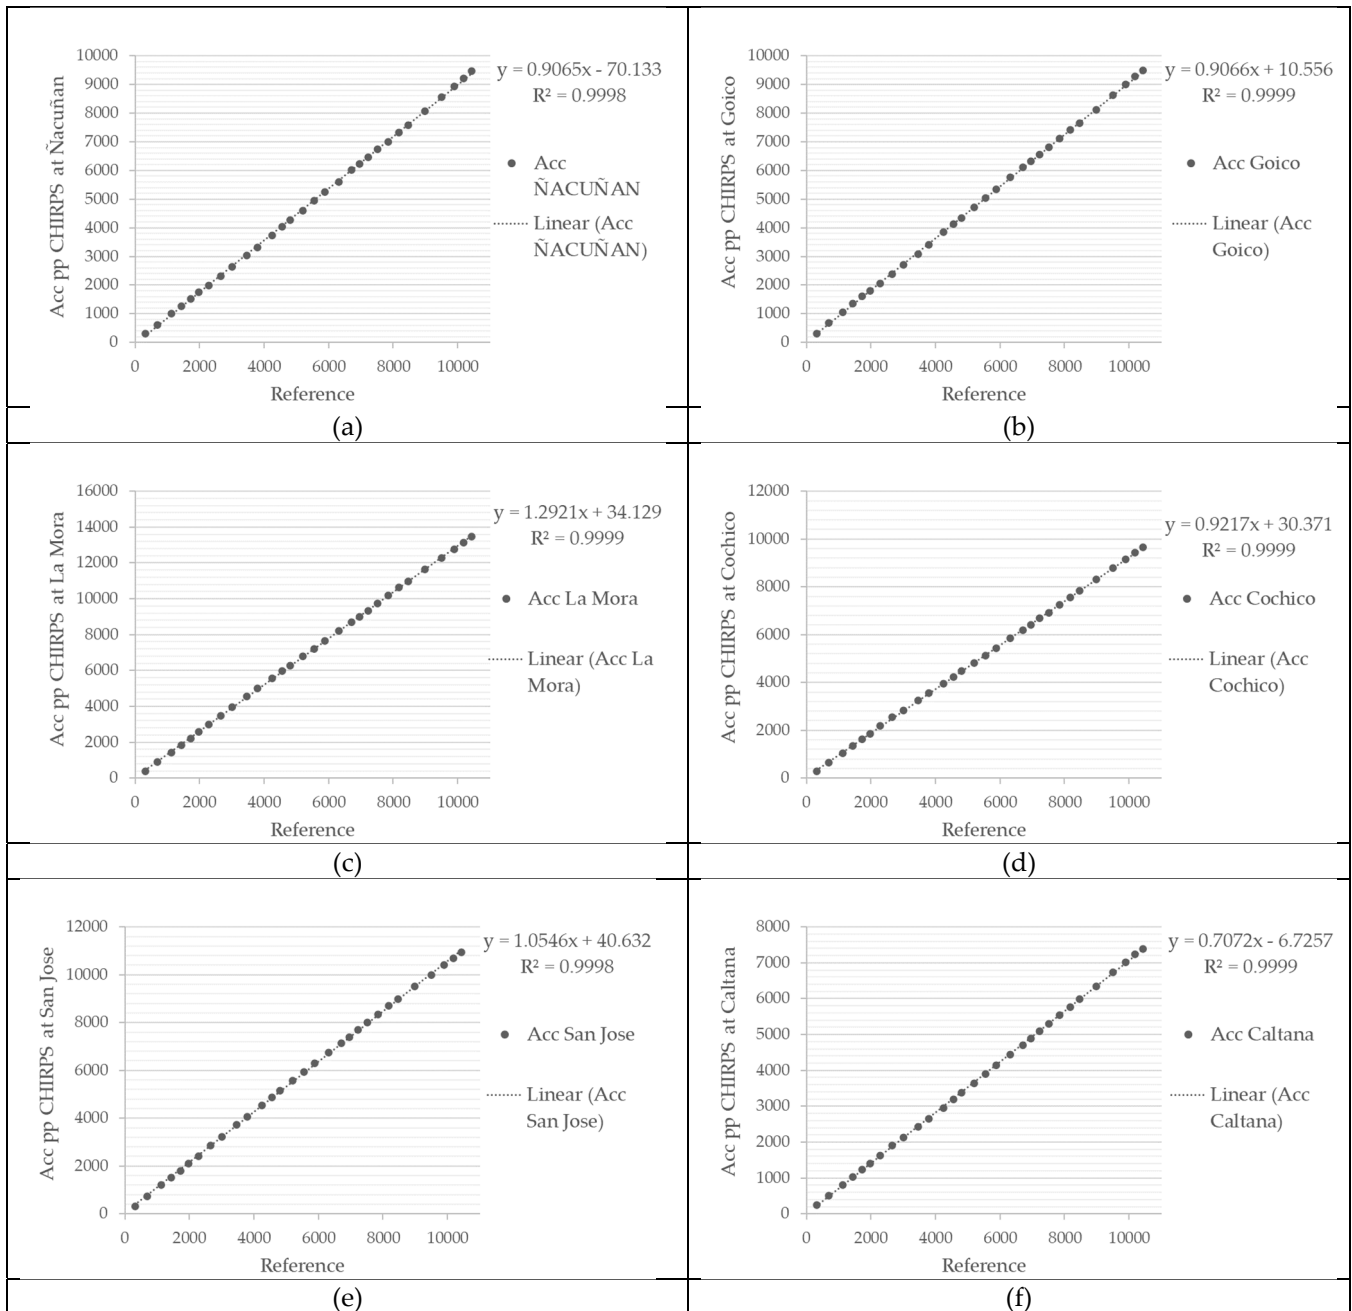

**Figure S1:** Double Mass Analyses for CHIRPS at a) Nacuñan, b) Goico, c) La Mora, d) Cochicó, e) San Jose, and f) Caltana.

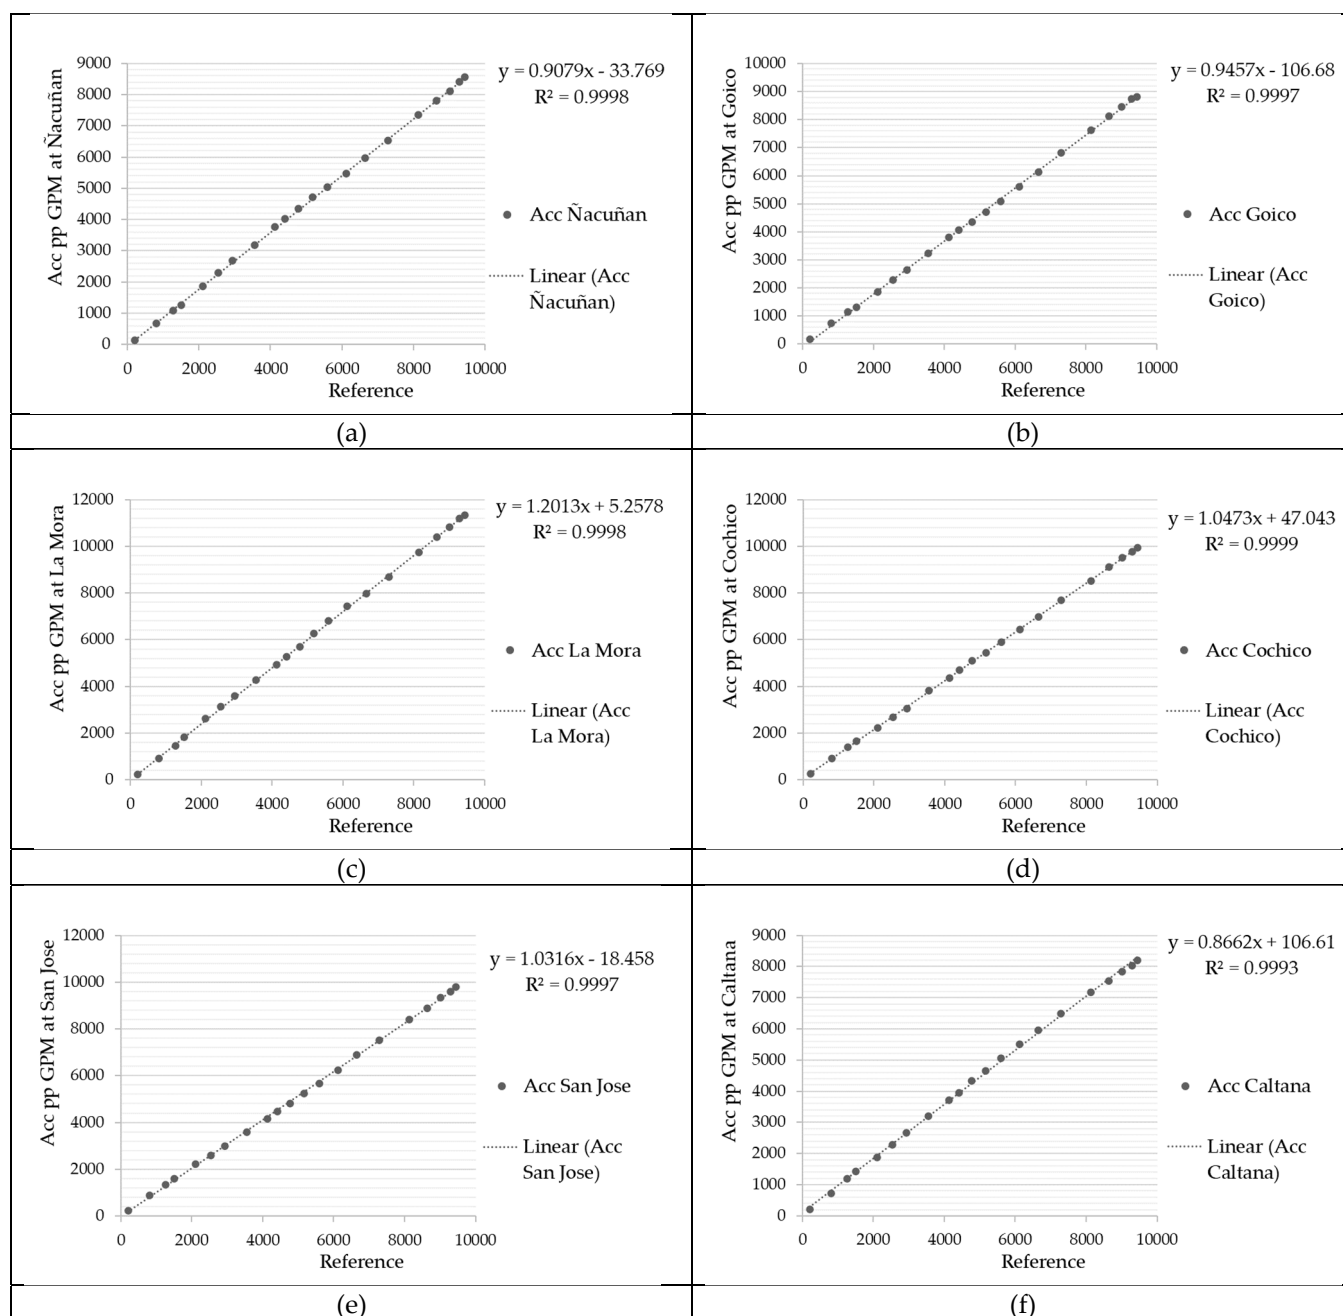

**Figure S2:** Double Mass Analyses for GPM at a) Nacuñan, b) Goico, c) La Mora, d) Cochicó, e) San Jose, and f) Caltana.

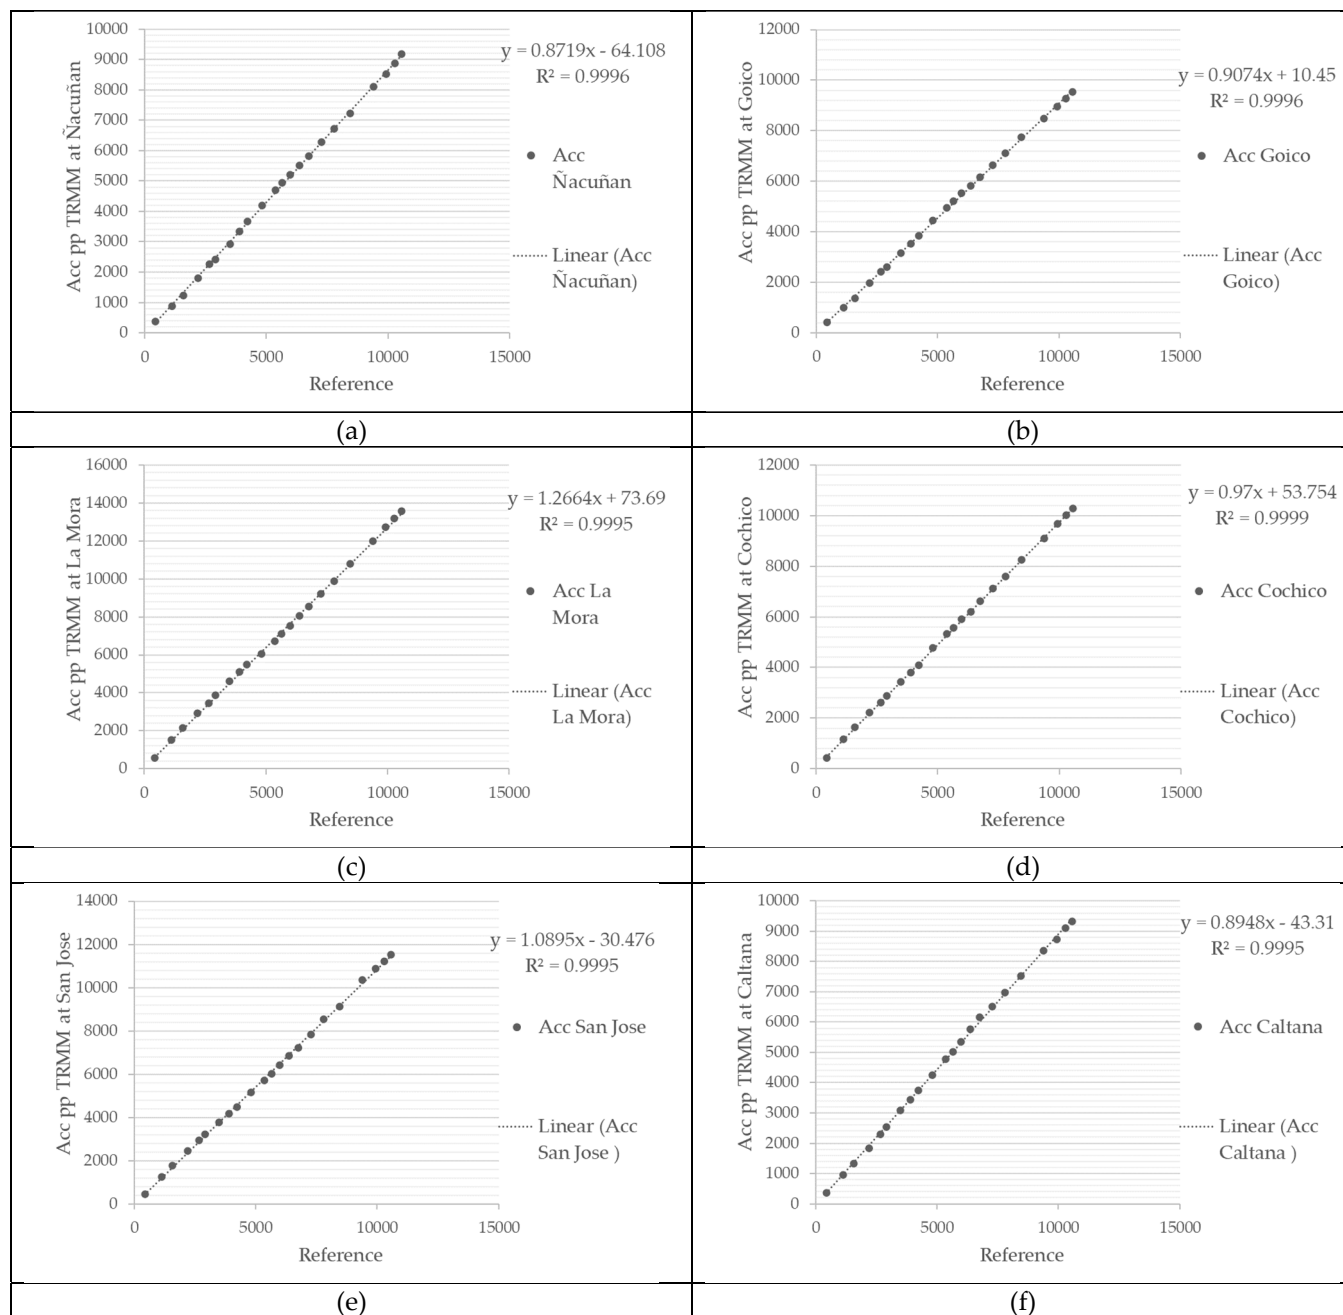

**Figure S3:** Double Mass Analyses for TRMM at a) Nacuñan, b) Goico, c) La Mora, d) Cochicó, e) San Jose, and f) Caltana.

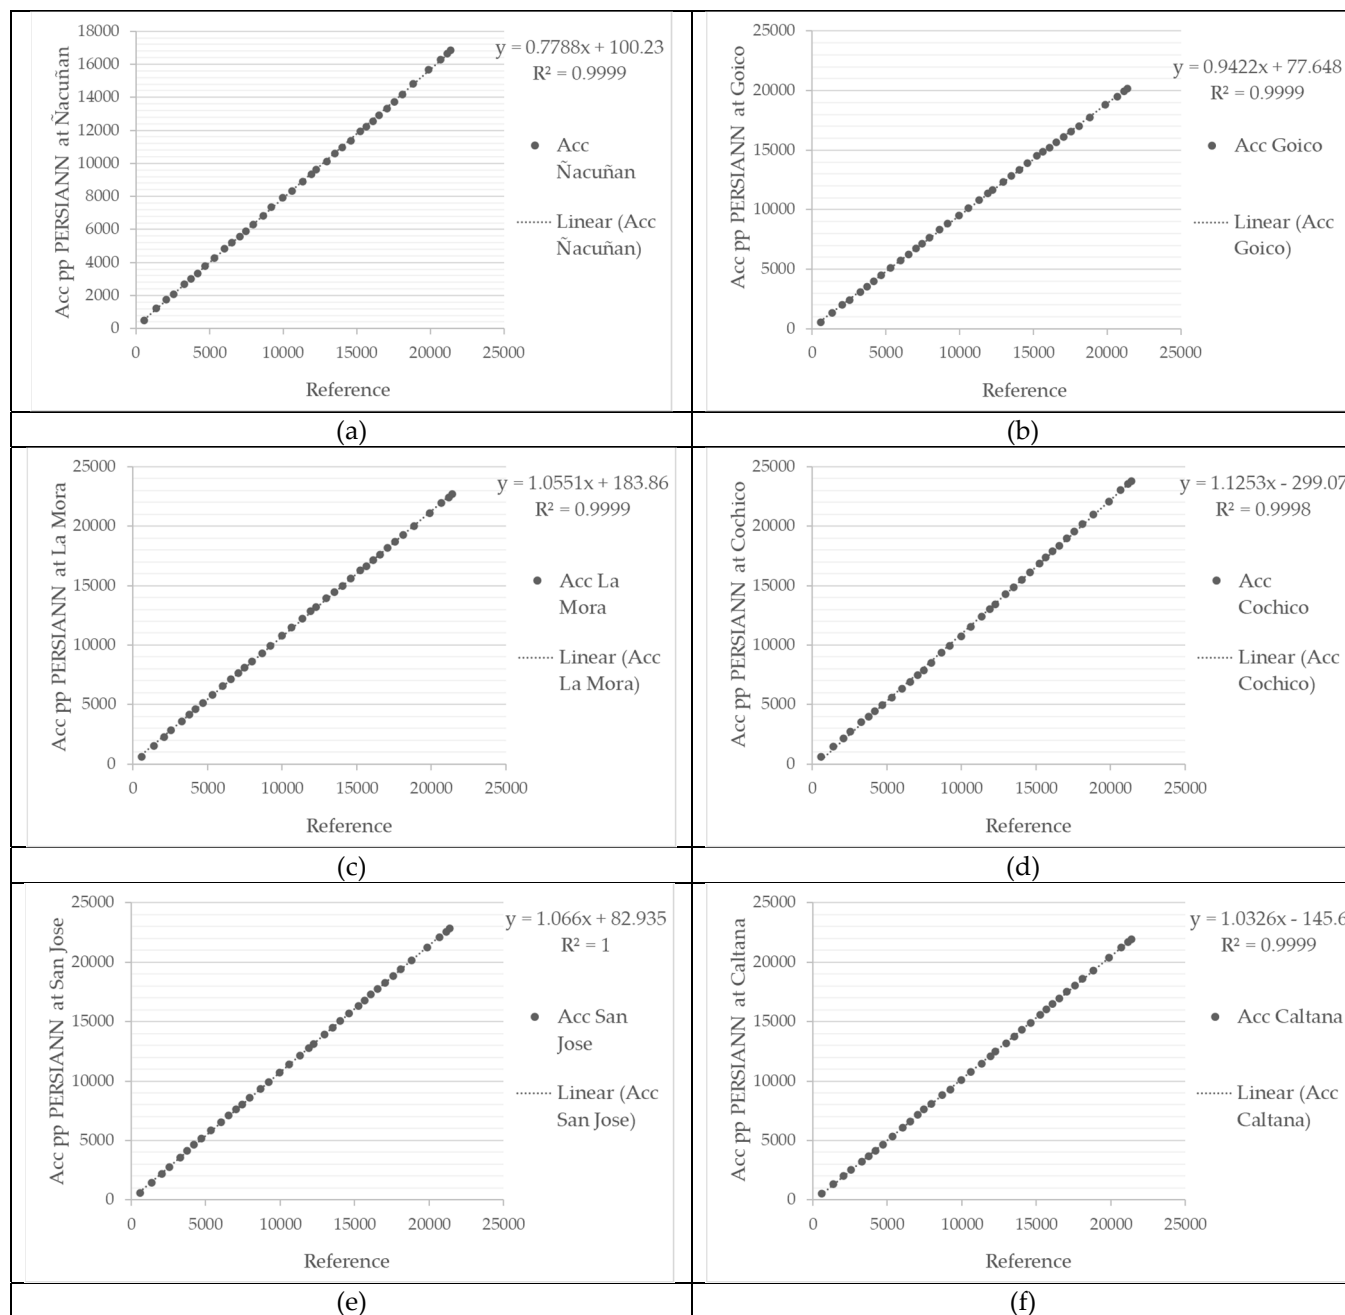

**Figure S4:** Double Mass Analyses for PERSIANN at a) Nacuñan, b) Goico, c) La Mora, d) Cochicó, e) San Jose, and f) Caltana.

**Table S1:** Monthly Pearson's Correlation Coefficient between gauged and satellite-estimated precipitation

|          | Ñacuñan | Cochicó | Goico | Caltana | La Mora | San Jose | Average |
|----------|---------|---------|-------|---------|---------|----------|---------|
| PERSIANN | 0.79    | 0.57    | 0.61  | 0.38    | 0.77    | 0.6      | 0.62    |
| CHIRPS   | 0.74    | 0.7     | 0.6   | 0.63    | 0.7     | 0.68     | 0.68    |
| TRMM     | 0.9     | 0.68    | 0.73  | 0.65    | 0.83    | 0.63     | 0.74    |
| GPM      | 0.9     | 0.72    | 0.73  | 0.74    | 0.87    | 0.73     | 0.78    |

**Table S2:** Monthly Mean Error between gauged and satellite-estimated precipitation

|          | Ñacuñan | Cochicó | Goico | Caltana | La Mora | San Jose | Average |
|----------|---------|---------|-------|---------|---------|----------|---------|
| PERSIANN | 8.77    | 30.98   | 15.48 | 19.55   | 6.84    | 11.83    | 15.58   |
| CHIRPS   | -12.30  | 4.27    | -1.58 | 1.14    | -12.85  | -8.16    | -4.91   |
| TRMM     | 4.30    | 14.41   | 7.18  | 3.56    | 9.89    | 2.32     | 6.94    |
| GPM      | 5.70    | 17.82   | 9.35  | 0.07    | 7.75    | 3.20     | 7.32    |

**Table S3:** Monthly BIAS between gauged and satellite-estimated precipitation

|          | Ñacuñan | Cochicó | Goico | Caltana | La Mora | San Jose | Average |
|----------|---------|---------|-------|---------|---------|----------|---------|
| PERSIANN | -0.27   | 1.26    | 0.52  | 0.57    | 0.15    | 0.29     | 0.42    |
| CHIRPS   | -0.41   | 0.17    | -0.05 | 0.04    | -0.29   | -0.2     | -0.12   |
| TRMM     | 0.15    | 0.58    | 0.25  | 0.11    | 0.24    | 0.05     | 0.23    |
| GPM      | 0.19    | 0.72    | 0.36  | 0.002   | 0.2     | 0.08     | 0.26    |

**Table S4** Monthly NSEC between gauged and satellite estimated precipitation

|          | Ñacuñan | Cochicó | Goico | Caltana | La Mora | San Jose | Average |
|----------|---------|---------|-------|---------|---------|----------|---------|
| PERSIANN | 0.48    | -1.92   | -0.03 | -1.17   | 0.57    | 0.25     | -0.30   |
| CHIRPS   | 0.32    | 0.47    | 0.35  | 0.38    | 0.39    | 0.4      | .39     |
| TRMM     | 0.7     | -0.48   | 0.37  | -0.03   | 0.52    | 0.18     | 0.21    |
| GPM      | 0.75    | -0.31   | 0.28  | 0.45    | 0.68    | 0.48     | 0.39    |

**Table S5** Monthly RMSE between gauged and satellite-estimated precipitation

|          | Ñacuñan | Cochicó | Goico | Caltana | La Mora | San Jose | Average |
|----------|---------|---------|-------|---------|---------|----------|---------|
| PERSIANN | 26.1    | 48.68   | 35.74 | 49.75   | 32.71   | 40.85    | 38.97   |
| CHIRPS   | 29.6    | 20.85   | 28.22 | 27.42   | 38.73   | 36.57    | 30.23   |
| TRMM     | 19.6    | 34.68   | 27.38 | 33.87   | 31.62   | 44.14    | 31.88   |
| GPM      | 18.1    | 32.57   | 28.08 | 24.7    | 25.03   | 31.96    | 26.74   |

**Table S6** Monthly RSR between gauged and satellite-estimated precipitation

|          | Ñacuñan | Cochicó | Goico | Caltana | La Mora | San Jose | Average |
|----------|---------|---------|-------|---------|---------|----------|---------|
| PERSIANN | 0.76    | 1.72    | 1.42  | 1.46    | 0.65    | 0.87     | 1.15    |
| CHIRPS   | 0.82    | 0.74    | 0.8   | 0.79    | 0.78    | 0.78     | 0.79    |
| TRMM     | 0.54    | 1.23    | 0.79  | 1.01    | 0.69    | 0.9      | 0.86    |
| GPM      | 0.5     | 1.15    | 0.85  | 0.74    | 0.57    | 0.72     | 0.76    |

**Table S7:** Annual Pearson's Correlation Coefficient between gauged and satellite-estimated precipitation

|          | Ñacuñan | Cochicó | Goico | Caltana | La Mora | San Jose | Average |
|----------|---------|---------|-------|---------|---------|----------|---------|
| PERSIANN | 0.9     | 0.77    | 0.78  | 0.52    | 0.82    | 0.59     | 0.73    |
| CHIRPS   | 0.9     | 0.77    | 0.64  | 0.7     | 0.67    | 0.66     | 0.72    |
| TRMM     | 0.88    | 0.74    | 0.87  | 0.57    | 0.84    | 0.52     | 0.74    |
| GPM      | 0.84    | 0.76    | 0.92  | 0.73    | 0.86    | 0.65     | 0.79    |

**Table S8:** Annual Mean Error between gauged and satellite estimated precipitation

|          | Ñacuñan | Cochicó | Goico  | Caltana | La Mora | San José | Average |
|----------|---------|---------|--------|---------|---------|----------|---------|
| PERSIANN | 111.1   | 369.2   | 185.25 | 209.86  | 88.23   | 140.17   | 183.97  |
| CHIRPS   | -150.5  | 50.3    | 18.85  | 29.48   | -143.04 | -100.59  | -49.25  |
| TRMM     | 58.7    | 172.3   | 86.13  | 42.72   | 122.62  | 22.37    | 84.14   |
| GPM      | 80.8    | 216.4   | 114.44 | 0.89    | 103.09  | 41.81    | 92.91   |

**Table S9:** Annual BIAS between gauged and satellite-estimated precipitation

|          | Ñacuñan | Cochicó | Goico | Caltana | La Mora | San José | Average |
|----------|---------|---------|-------|---------|---------|----------|---------|
| PERSIANN | 0.3     | 1.24    | 0.51  | 0.53    | 0.17    | 0.29     | 0.51    |
| CHIRPS   | -0.41   | 0.17    | -0.05 | 0.07    | -0.28   | -0.21    | -0.12   |
| TRMM     | 0.16    | 0.58    | 0.25  | 0.11    | 0.25    | 0.04     | 0.23    |
| GPM      | 0.22    | 0.72    | 0.36  | 0.002   | 0.22    | 0.09     | 0.27    |

**Table S10:** Annual NSEC between gauged and satellite-estimated precipitation

|          | Ñacuñan | Cochicó | Goico | Caltana | La Mora | San José | Average |
|----------|---------|---------|-------|---------|---------|----------|---------|
| PERSIANN | 0.12    | -24.38  | -1.06 | -5.3    | 0.45    | -0.26    | -5.07   |
| CHIRPS   | -0.67   | 0.11    | 0.37  | 0.4     | -0.16   | 0.1      | 0.03    |
| TRMM     | 0.51    | -6.32   | 0.43  | -0.54   | -9.87   | -0.04    | -2.64   |
| GPM      | 0.25    | -8.23   | 0.13  | 0.36    | 0.43    | 0.27     | -1.13   |

**Table S11:** Annual RMSE between gauged and satellite-estimated precipitation

|          | Ñacuñan | Cochicó | Goico  | Caltana | La Mora | San José | Average |
|----------|---------|---------|--------|---------|---------|----------|---------|
| PERSIANN | 131.2   | 400     | 211.25 | 285.96  | 141.02  | 209.63   | 229.84  |
| CHIRPS   | 57      | 74.9    | 118.37 | 88.19   | 205.51  | 177.57   | 120.26  |
| TRMM     | 98.3    | 214.7   | 114.63 | 141.15  | 648.35  | 196.5    | 235.61  |
| GPM      | 121.8   | 241.2   | 129.6  | 91.02   | 138.71  | 134.82   | 142.86  |

**Table S12:** Annual RSR between gauged and satellite-estimated precipitation

|          | Ñacuñan | Cochicó | Goico | Caltana | La Mora | San José | Average |
|----------|---------|---------|-------|---------|---------|----------|---------|
| PERSIANN | 0.89    | 4.56    | 1.42  | 2.37    | 0.73    | 1.12     | 1.85    |
| CHIRPS   | 0.44    | 0.85    | 0.78  | 0.73    | 1.06    | 0.94     | 0.80    |
| TRMM     | 0.67    | 2.45    | 0.74  | 1.17    | 3.22    | 1        | 1.54    |
| GPM      | 0.83    | 2.75    | 0.91  | 0.75    | 0.74    | 0.83     | 1.14    |
